# Supplementary material for: External standard calibration method for high-repetition-rate shock tube kinetic studies with synchrotron-based time-of-flight mass spectrometry
Source: Royal Society of Chemistry journal article supplement (doi:10.1039/d3an00819c), 2024-01-01
Supplement: d3an00819c1.pdf [file d3an00819c1.pdf]

## SUPPLEMENTAY INFORMATION

### External standard calibration method for high-repetition-rate shock tube kinetic studies with synchrotron-based time-of-flight mass spectrometry

F. E. Cano Ardila<sup>a</sup>, S. Nagaraju<sup>a</sup>, R. S. Tranter<sup>b</sup>, G. A. Garcia<sup>c</sup>, A. Desclaux<sup>a</sup>, A. Roque Ccacya<sup>a</sup>, N. Chaumeix<sup>a</sup>, A. Comandini<sup>a,\*</sup>

*a. CNRS-INSIS, I.C.A.R.E., 1C Avenue de la recherche scientifique, 45071 Orléans cedex 2, France*

*b. Chemical Sciences and Engineering Department, Argonne National Laboratory, 9700 S. Cass Avenue, Lemont, Illinois 60439, USA*

*c. Synchrotron SOLEIL, L'Orme des Merisiers, St. Aubin BP 48, 91192 Gif sur Yvette, France*

*\* corresponding author. E-mail address: andrea.comandini@cnrs-orleans.fr*

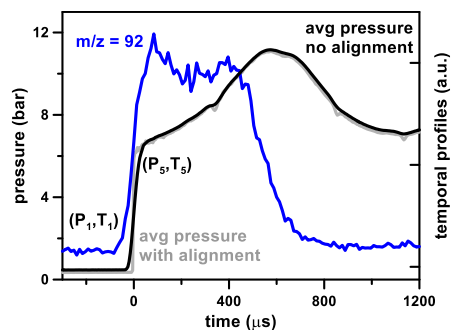

Fig S1. Pressure profile from 1 000 experiments from raw data (black) or with shifting for alignment (grey);  $m/z$  92 profile from 107 000 experiments, toluene pyrolysis, 0.1% in argon,  $T_5 = 1362 \pm 22$  K and  $P_5 = 6.6 \pm 0.2$  bar, photon energy 10.0 eV.

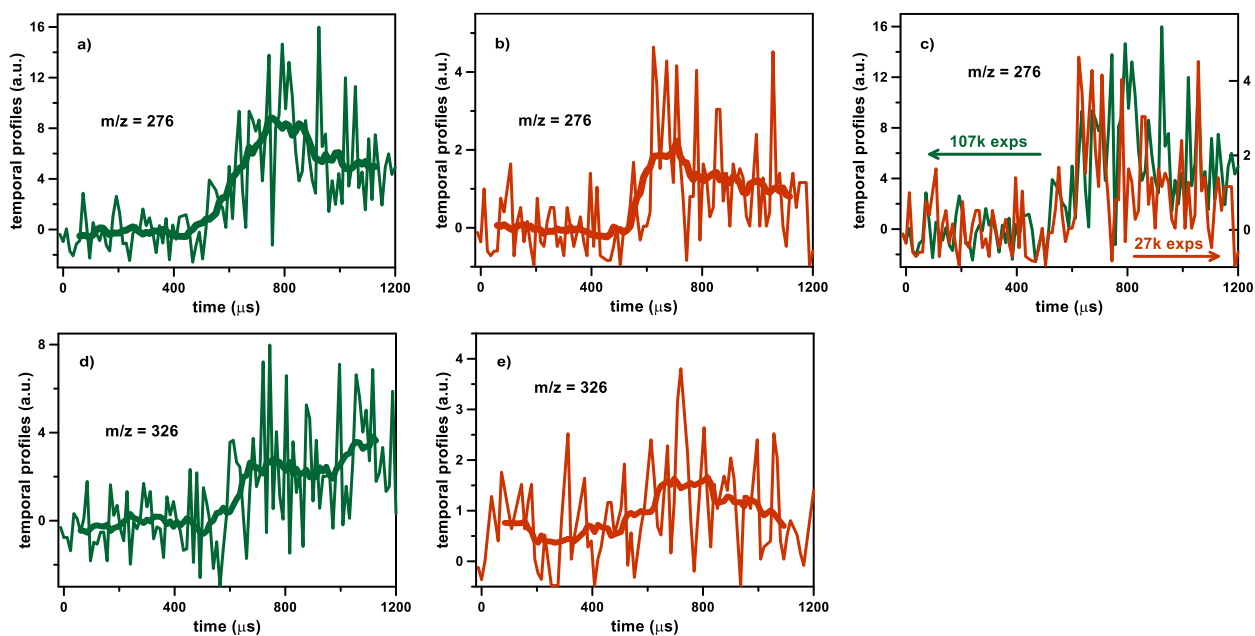

Fig. S2. Raw signals for a) to c)  $m/z$  276; d)-e)  $m/z$  326; toluene pyrolysis, at  $T = 1362 \pm 22$  K and  $P = 6.6 \pm 0.2$  bar, photon energy 10.0 eV. a)-d) 107 000 experiments; b)-e) 27 000 experiments. Bold lines obtained through running average fitting.

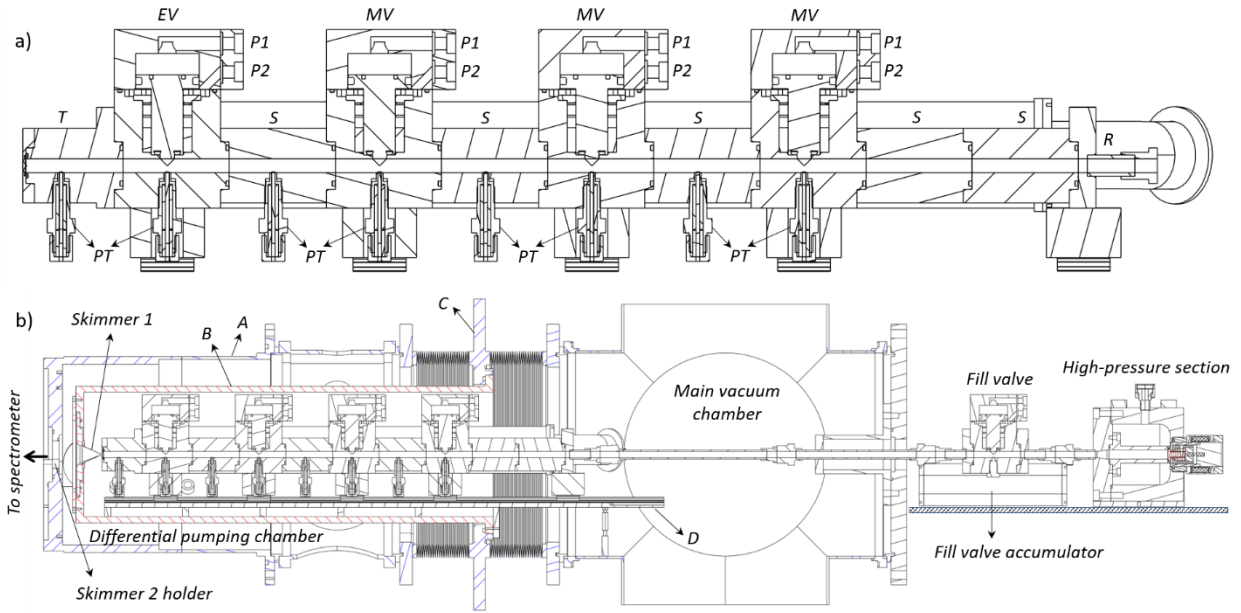

Fig. S3. a) Schematic of the low pressure section; b) HRRST/SAPHIRS coupling [from S. Nagaraju, R. S. Tranter, F. E. Cano Ardila, S. Abid, P. T. Lynch, G. A. Garcia, J. F. Gil, L. Nahon, N. Chaumeix, A. Comandini, Pyrolysis of ethanol studied in a new high-repetition-rate shock tube coupled to synchrotron-based double imaging photoelectron/photoion coincidence spectroscopy, *Comb. Flame*, 2021, 226, 53–68].
